# Supplementary figures and images for: Extracellular Enzymes Facilitate Electron Uptake in Biocorrosion and Bioelectrosynthesis
Source: PubMed Central journal article supplement — mBio. 2015 Apr 21;6(2):e00496-15. doi: 10.1128/mBio.00496-15 (PMC4453541; doi:10.1128/mbio.00496-15), 2015-04-21

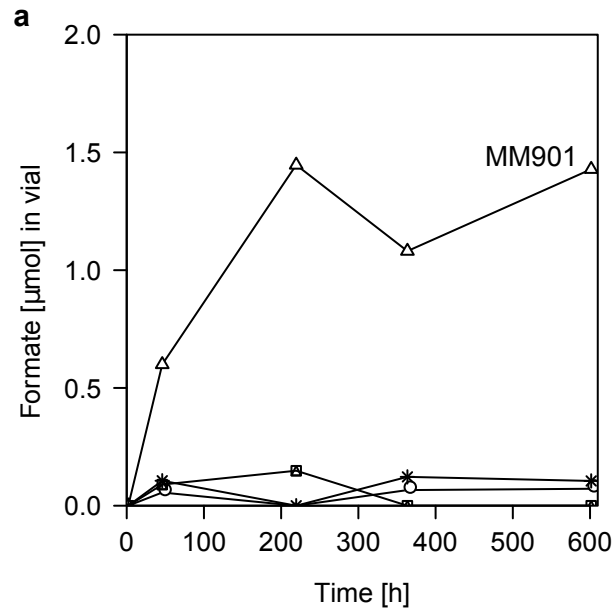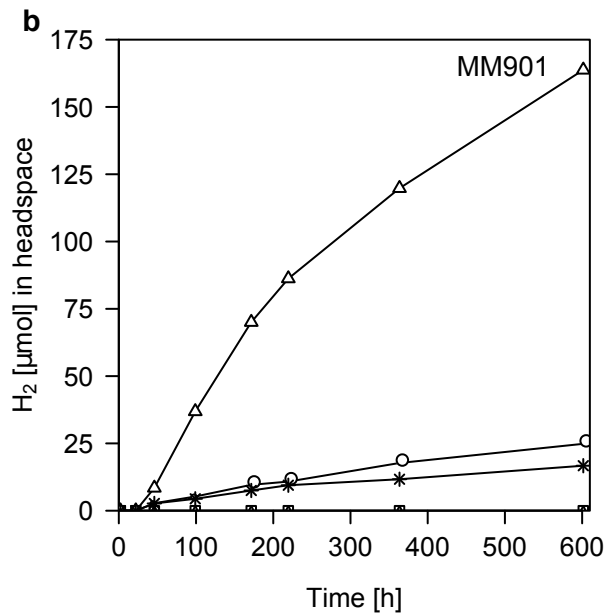

Supplement: mbo002152288sf1.pdf [file mbo002152288sf1.pdf]

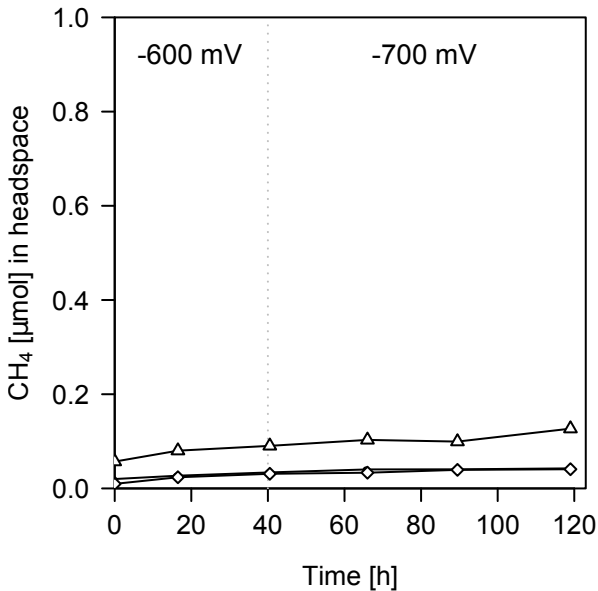

Supplement: mbo002152288sf2.pdf [file mbo002152288sf2.pdf]

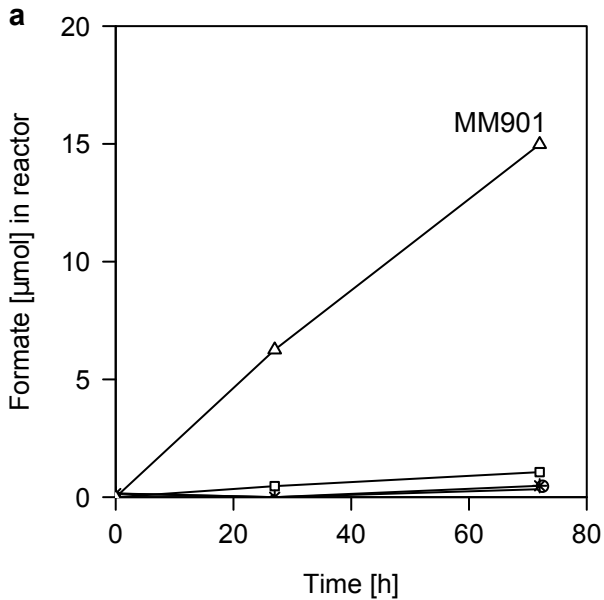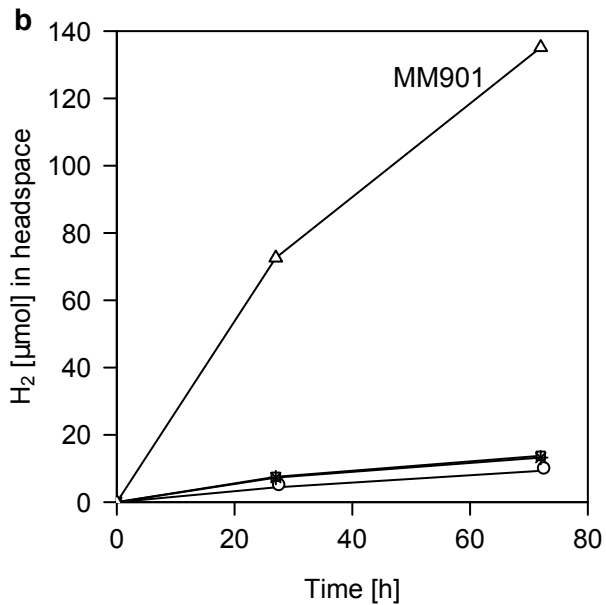

Supplement: mbo002152288sf3.pdf [file mbo002152288sf3.pdf]
